# Supplementary material
Source: HighWire-hosted journal article supplement (http://www.cmaj.ca/highwire/filestream/57552/field_highwire_adjunct_files/0/pg1439f.pdf)
Supplement: pg1439f.pdf [file pg1439f.pdf]

# Syndrome sérotoninergique : une brève analyse

Philippe Birmes, Dominique Coppin, Laurent Schmitt, Dominique Lauque

## Observation 1

Un homme de 50 ans est hospitalisé pour sueurs profuses, nausées, vomissements et diarrhée. Il prend de la fluoxétine (120 mg/jour), du méprobamate (400 mg/jour) et de l'acéprométazine (13,55 mg/jour). Il vient d'augmenter la posologie de fluoxétine. Il présente une excitation avec insomnie et une hyperréflexie sans signe de focalisation neurologique. La tension artérielle est à 155/80 mmHg, la fréquence cardiaque à 96 battements par minute, la fréquence respiratoire, à 20 cycles par minute et la température, à 37,2 °C. La formule numération sanguine, la kaliémie, la glycémie, les tests hépatiques, la fonction rénale et la vitesse de sédimentation sont normaux. L'alcoolémie est négative. L'électrocardiogramme, le cliché thoracique, la gazométrie et la tomodynamométrie cérébrale sont sans anomalie.

## Observation 2

Une femme de 50 ans, souffrant de dépression, est hospitalisée pour agitation, insomnie et tremblements. Elle prend du citalopram (20 mg/jour), du prazépam (10 mg/jour), du méprobamate (400 mg/jour) et de l'acéprométhazine (13,55 mg/jour). La tension artérielle est à 135/70 mmHg, la fréquence cardiaque, à 130 battements par minute, la fréquence respiratoire, à 32 cycles par minute et la température, à 37 °C. La patiente est confuse, avec une hypersudation, une hyperréflexie et des myoclonies sans signe de focalisation. Les électrolytes sanguins sont normaux, les globules blancs à 13,3 ↔ 109/L, la créatinine kinase totale à 494 U/L (isoenzyme MB < 6 %). L'aldolase, les tests hépatiques, la créatininémie, l'hémoglobine, les plaquettes et les fibrinogènes sont normaux. Les analyses qualitatives plasmatiques d'alcool, de carbamates, de salicylés, de paracétamol, de barbituriques, de benzodiazépines et d'antidépresseurs tricycliques sont négatives. L'électrocardiogramme retrouve la tachycardie sinusale. Une tomodynamométrie cérébrale est normale.

La sérotonine (5-HT) est un neurotransmetteur dont les neurones sont localisés dans les noyaux du raphé. Les neurones sérotoninergiques interviennent dans les cycles veille-sommeil, l'humeur, les comportements émotionnels et alimentaires et la thermorégulation<sup>1</sup>. Le syndrome sérotoninergique (SS) résulte d'une hyperstimulation des récepteurs 5-HT<sub>1A</sub>. Il s'agit d'une complication des inhibiteurs spécifiques du recaptage de la sérotonine (ISRS), des antidépresseurs tricycliques (ADT), des inhibiteurs de la monoamine-oxydase (IMAO) ou d'autres agents sérotoninergiques<sup>2-5</sup>. L'utilisation des ISRS

est en rapport avec la fréquence du syndrome<sup>2,3</sup>. Sans prédominance pour l'âge ni pour le sexe, le début s'observe dans les 24 heures suivant l'instauration ou le surdosage d'un agent sérotoninergique<sup>2,4</sup>. Le SS est caractérisé par la triade troubles neuropsychiatriques, neurovégétatifs et neuromusculaires<sup>2,4,6-8</sup>. Les critères diagnostiques sont classés en majeurs et mineurs : un SS s'affirme avec quatre symptômes majeurs ou trois majeurs plus deux mineurs<sup>3,9</sup>. Le SS peut être fatal, mais la majorité des cas ont un bon pronostic à l'arrêt du médicament<sup>2,4</sup>. Une amélioration grâce à la cyproheptadine ou la chlorpromazine est signalée<sup>3</sup>. Le propranolol et la ziprasidone, qui bloquent les récepteurs 5-HT<sub>1A</sub>, mériteraient que leurs effets thérapeutiques soient étudiés.

## Physiopathologie

Le SS est la conséquence d'une hyperstimulation des récepteurs 5-HT<sub>1A</sub> des noyaux gris centraux et de la moelle et peut-être des récepteurs 5-HT<sub>2</sub><sup>2,4,10</sup>. Peu de cas sont rapportés pour le citalopram<sup>11</sup>, mais il a été impliqué isolément<sup>2</sup>. Pour la fluoxétine, une posologie élevée augmente le risque de SS<sup>4,7,9</sup>. Les associations médicamenteuses ont pu également jouer un rôle. Le méprobamate, métabolisé par le foie par hydroxylation et glucuronocouplage, pourrait ralentir le métabolisme d'un ISRS par inhibition compétitive. La prométhazine, antagoniste compétitif des récepteurs 5-HT<sub>2</sub><sup>12</sup>, pourrait être responsable, en présence d'ISRS, d'une hyperactivation des récepteurs 5-HT<sub>1A</sub>.

Plusieurs situations attestent d'une hyperstimulation des récepteurs 5-HT<sub>1A</sub> : excès des précurseurs de la sérotonine ou de ses agonistes, augmentation de sa libération, diminution de son recaptage ou ralentissement du métabolisme<sup>2,3,8</sup> (voir le tableau 1). *L'Hypericum perforatum* (millepertuis), qui inhibe in vitro le recaptage de 5-HT, a déjà été en cause en association avec des ISRS<sup>13</sup>.

## Diagnostic

Le SS est un diagnostic clinique d'exclusion<sup>2,8</sup>. Un agent sérotoninergique, des critères reconnus et l'exclusion d'autres conditions sont requis<sup>2,9</sup>. Le SS associe des troubles neuropsychiatriques, neurovégétatifs et neuromusculaires apparaissant brutalement moins de 24 heures après le début ou le surdosage d'un traitement<sup>2,4,6,9</sup>. Les critères de Sternbach<sup>14</sup> guident le diagnostic de SS, mais il reste délicat en cas de symptômes bénins ou d'examen neu-

An English version of this article may be found at [www.cmaj.ca](http://www.cmaj.ca)

rologique normal<sup>3,9,15</sup>. Radomski et al.<sup>9</sup> ont révisé ces critères et classent le SS en incomplet, complet ou caractérisé (quatre symptômes majeurs ou trois majeurs plus deux mineurs) (voir l'encadré 1), ou toxique (coma, crises tonico-cloniques généralisées, fièvre pouvant dépasser 40 °C)<sup>3,9</sup>. Nos cas correspondaient à un SS caractérisé :

début brutal suivant l'augmentation de la posologie d'ISRS, avec respectivement trois symptômes majeurs plus deux mineurs, et cinq majeurs.

Les examens complémentaires n'apportent aucune spécificité. Une augmentation des créatines-kinases totales et des globules blancs était déjà signalée, ainsi qu'une éléva-

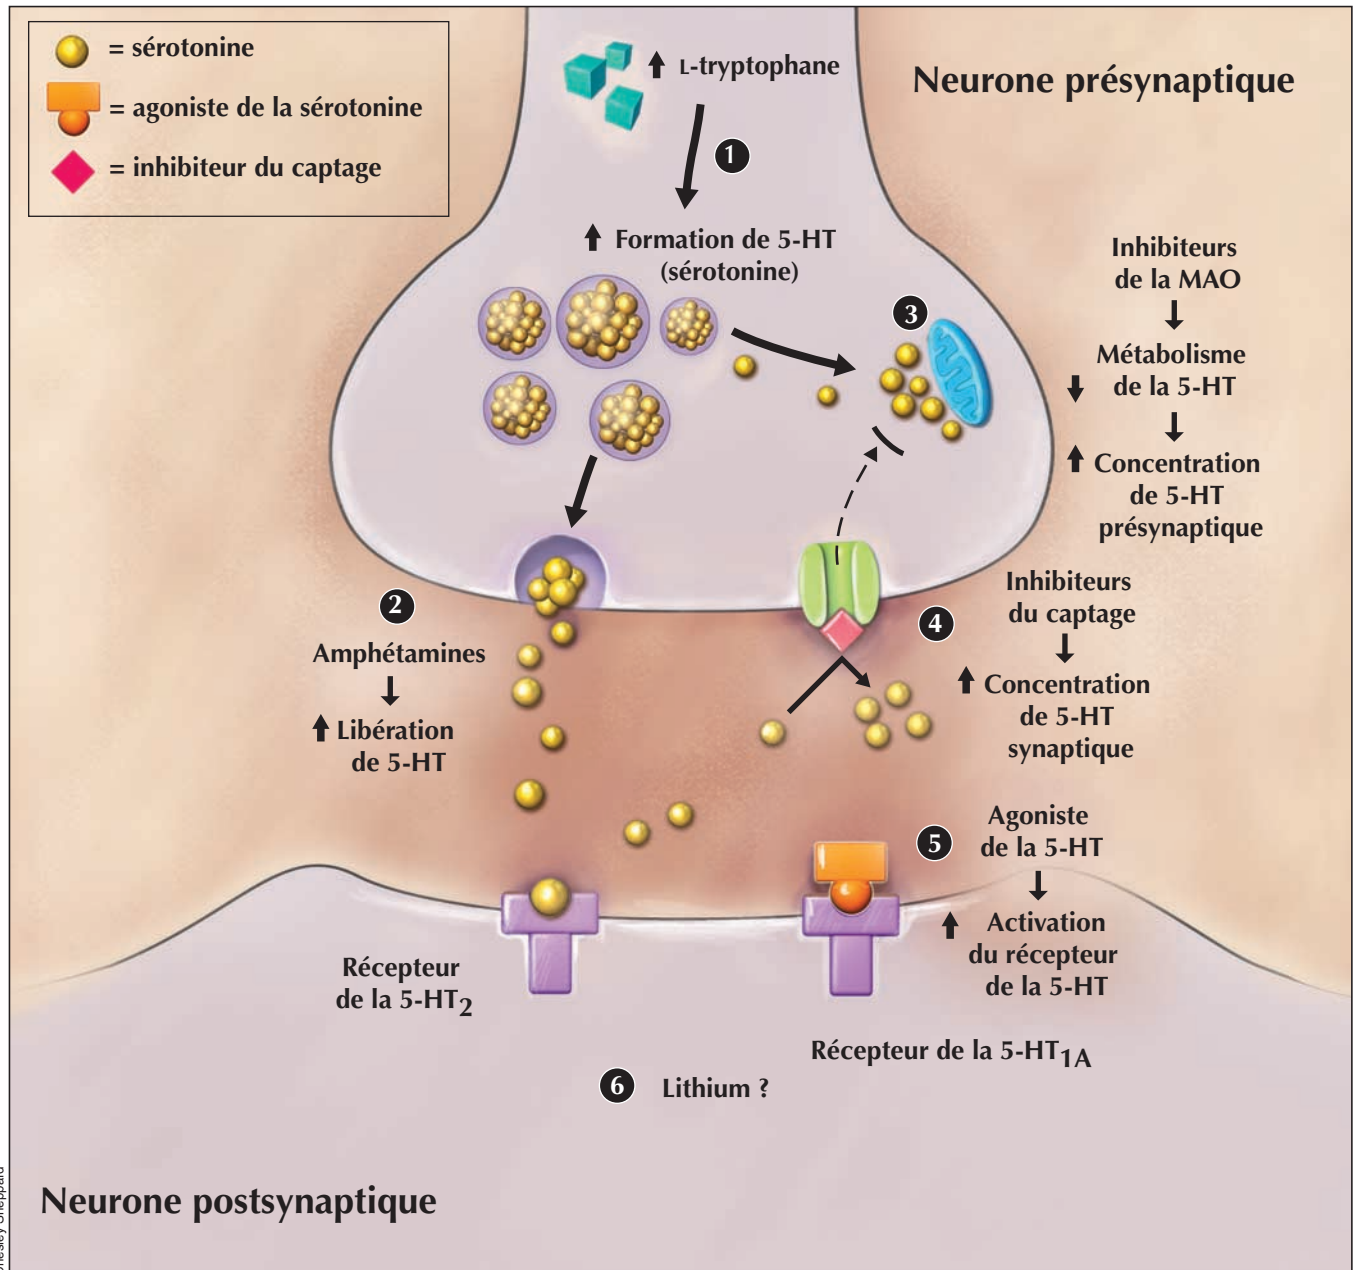

Figure 1 : Mécanismes du syndrome sérotonergique. (1) Des doses accrues de L-tryptophane augmentent proportionnellement la formation de 5-hydroxytryptamine (5-HT ou sérotonine). (2) Les amphétamines et d'autres médicaments augmentent la libération de la sérotonine emmagasinée. (3) L'inhibition du métabolisme de la sérotonine par les inhibiteurs de la monoamine oxydase (MAO) augmentent la concentration de 5-HT présynaptique. (4) Un déficit du transport de la sérotonine vers le neurone présynaptique par des inhibiteurs du captage (par exemple, inhibiteurs spécifiques du recaptage de la sérotonine, antidépresseurs tricycliques) augmente la concentration de 5-HT synaptique. (5) Des agonistes sérotoninergiques directs peuvent stimuler les récepteurs de la 5-HT postsynaptique. (6) Le lithium augmente les réponses des récepteurs postsynaptiques. Adapté avec la permission d'Elsevier Science (*Critical Care Clinics* 1997;13[4]:763-83).

tion des transaminases ou une baisse des bicarbonates<sup>2,3,8</sup>. La coagulation intravasculaire disséminée, l'insuffisance rénale, l'acidose ou le syndrome de détresse respiratoire aiguë sont des complications secondaires<sup>2,9</sup>.

Il est essentiel d'éliminer les autres diagnostics<sup>2-4</sup> (voir l'encadré 2). Le syndrome malin des neuroleptiques (SMN) est le diagnostic le plus confondu<sup>2,7,8,10,16</sup>. Les critères communs sont l'altération de la conscience, la diaphorèse, l'instabilité autonome, l'hyperthermie et l'élévation des créatines-kinases. Le SMN s'observe le plus souvent après une augmentation rapide d'une posologie de neuroleptique<sup>2,10,17</sup>. Les symptômes apparaissent dans les sept jours dans 66 % des cas<sup>17</sup>. Certains facteurs de vulnérabilité (déshydratation, agitation, troubles cérébraux organiques) sont associés à une courte exposition<sup>18</sup>. Nos patients prenaient une phénothiazine, (acéprométazine), un des agents antipsychotiques en cause dans le SMN, mais l'absence d'hyperthermie et de rigidité musculaire, une diarrhée et des myoclonies faisaient retenir le SS<sup>19,20</sup>. Nous rappelons dans le Tableau 2 les distinctions les plus fréquentes entre SS et SMN.

## Traitement

Les agents sérotoninergiques doivent être stoppés<sup>2,3,9</sup>. Une perfusion sous monitoring en milieu hospitalier maintient une diurèse supérieure à 50-100 mL/h, pour écarter le risque de myoglobulinurie<sup>3</sup>. Les benzodiazépines réduisent l'anxiété. Un cas d'amélioration partielle a été signalé lors d'un traitement par propranolol<sup>21</sup>. Le bénéfice des bêta-bloqueurs, qui bloquent les récepteurs 5-HT<sub>1A</sub>, pourrait être étayé par d'autres travaux<sup>16</sup>. La réanimation (refroidissement, ventilation artificielle, anticonvulsivants, antihypertenseurs) s'adresse aux cas graves<sup>2,3,22,23</sup>.

Bien que leur efficacité ne soit pas prouvée scientifiquement, la cyproheptadine et la chlorpromazine sont citées<sup>2,3</sup>. La cyproheptadine est un antagoniste des récepteurs histaminiques H1 avec des propriétés anticholinergiques et antisérotoninergiques; elle peut provoquer

une somnolence et des effets anticholinergiques<sup>22,24</sup>. La chlorpromazine est un neuroleptique antagoniste des récepteurs 5-HT<sub>1A</sub> et 5-HT<sub>2</sub>; elle peut avoir des effets anticholinergiques et provoquer une hypotension, des dystonies ou un SMN<sup>3,22,25</sup>. La cyproheptadine semble privilégiée (en prise orale) du fait d'effets adverses moindres<sup>3</sup>. Parmi les nouveaux antipsychotiques, la ziprasidone est le plus puissant pour bloquer les récepteurs 5-HT<sub>1A</sub><sup>26</sup>. Des travaux pourraient s'intéresser à ses bénéfices éventuels; elle a des effets extrapyramidaux modérés.

## Évolution

La majorité des patients s'améliorent complètement 24 heures après l'admission; les sujets recevant de la cyproheptadine ou de la chlorpromazine sont dans ce cas<sup>2</sup>. Pour 40 % des patients, des symptômes persistent plus longtemps. La gravité serait d'autant plus élevée que l'agent sérotoninergique est puissant et la dose, importante; la durée semble en relation avec la demi-vie du médicament<sup>4,27</sup>. La prescription de métoclopramide anti-émétique peut augmenter la longue demi-vie (4 à 6 jours) de la fluoxétine<sup>28</sup>.

### Encadré 1 : Critères diagnostiques révisés pour le syndrome sérotoninergique caractérisé, Jaunay et al.<sup>3</sup>, d'après Radomski et al.<sup>9</sup>

1. Addition (ou augmentation) d'un agent sérotoninergique à un traitement déjà établi et apparition d'au moins quatre symptômes majeurs ou trois symptômes majeurs plus deux symptômes mineurs

#### Symptômes neuropsychiatriques (cognitivo-comportementaux)

Symptômes majeurs : confusion, élévation de l'humeur, coma ou semi-coma

Symptômes mineurs : agitation et nervosité, insomnie

#### Symptômes neurovégétatifs

Symptômes majeurs : fièvre, hypersudation

Symptômes mineurs : tachycardie, tachypnée et dyspnée, diarrhée, hypo ou hypertension artérielle

#### Symptômes neuromusculaires

Symptômes majeurs : myoclonies, tremblements, frissons, rigidité, hyperréflexie

Symptômes mineurs : incoordination, mydriase, akathisie

2. Ces symptômes ne doivent pas correspondre à un trouble psychiatrique, ou son aggravation, antérieur à la prise de l'agent sérotoninergique.

3. Les étiologies infectieuses, métaboliques, endocrines ou toxiques doivent être écartées.

4. Un traitement neuroleptique ne doit pas avoir été introduit, ni sa posologie augmentée, avant le début des symptômes.

**Tableau 1 : Situations responsables d'hyperstimulation des récepteurs 5-HT<sub>1A</sub>**<sup>2,3,8</sup>

| Situation                                                  | Médicaments associés                                             |
|------------------------------------------------------------|------------------------------------------------------------------|
| Excès des précurseurs de la sérotonine ou de ses agonistes | Buspirone, L-dopa, lithium, LSD, L-tryptophane, trazodone        |
| Augmentation de la libération de sérotonine                | Amphétamines, cocaïne, MDMA («ecstasy»), fenfluramine, réserpine |
| Diminution du recaptage de la sérotonine                   | ISRS, ADT, trazodone, venlafaxine, mépéridine                    |
| Ralentissement du métabolisme de la sérotonine             | IMAO : isocarboxazide, sélégiline                                |

Note : LSD = lysergic acid diethylamide, MDMA = methylenedioxy-methamphetamine, ISRS = inhibiteurs spécifiques du recaptage de la sérotonine, ADT = antidépresseurs tricycliques, IMAO = inhibiteurs de la monoamine-oxydase.

**Encadré 2 : Principaux diagnostics différentiels d'un syndrome sérotoninergique<sup>2,3</sup>**

- Syndrome malin aux neuroleptiques
- Causes infectieuses
- Encéphalopathie herpétique
- Coup de chaleur
- Nécrose myocardique
- Delirium tremens
- Intoxications par sympathomimétiques ou anticholinergiques

**Retour aux observations**

**Observation 1**

Un SS est évoqué devant la posologie de fluoxétine et la présence de trois symptômes majeurs (élévation de l'humeur, hypersudation, hyperréflexie) plus deux mineurs (insomnie, diarrhée).

Les médicaments du patient sont arrêtés. Il reçoit 3 litres/24 heures de soluté électrolytique, 10 mg de dichlorhydrate de métoclopramide intraveineux toutes les 8 heures et 20 mg de chlorazépate dipotassique en prise orale toutes les 12 heures. Les nausées, les vomissements, la diaphorèse et la diarrhée disparaissent en 72 heures. L'anxiété s'améliore plus lentement. Le patient quitte l'hôpital au bout de cinq jours.

**Observation 2**

Un SS est évoqué devant la prise de citalopram, avec probable intoxication volontaire, et la présence de cinq symptômes majeurs (confusion, myoclonies, tremblements, hyperréflexie, hypersudation).

**Tableau 2 : Distinctions les plus fréquentes entre le syndrome sérotoninergique et le syndrome malin des neuroleptiques<sup>2,3,8-10,17-20</sup>**

|           | Syndrome sérotoninergique                                                     | Syndrome malin des neuroleptiques                                                                     |
|-----------|-------------------------------------------------------------------------------|-------------------------------------------------------------------------------------------------------|
| Début     | Brutal, dans les 24 heures suivant l'introduction d'un agent sérotoninergique | Plus lent, dans les 7 jours suivant l'introduction d'un neuroleptique                                 |
| Symptômes | Agitation, diarrhée                                                           | Dysphagie, hypersialorrhée, incontinence                                                              |
| Signes    | Dilatation pupillaire, myoclonies, hyperréflexie                              | Hyperthermie franche (> 38 °C), akinésie, rigidité extrapyramidale en «tuyau de plomb», rhabdomyolyse |
| Mortalité | 23 décès recensés jusqu'en 1999*                                              | 15 % à 20 %                                                                                           |

\*Les écrits scientifiques ne donnent pas de pourcentage, le nombre de cas étant trop faible.

Les médicaments sont arrêtés. La patiente reçoit 3 litres/24 heures de soluté électrolytique. L'amélioration de la confusion et des symptômes neurovégétatifs et neuromusculaires autorise le retour au domicile 24 heures plus tard.

**Conclusion**

Ces observations présentaient un contexte clinique évocateur avec la triade des signes neuropsychiatriques, neuromusculaires et neurovégétatifs. Il s'agit de l'une des premières fois où deux cas de SS sont rapportés avec les critères révisés de Radomski. Cette classification améliore le raisonnement clinique et permet d'évaluer rapidement la gravité. L'arrêt des agents incriminés et un traitement symptomatique sont efficaces. On doit prévenir ce syndrome en éduquant les patients pour éviter l'automédication, en limitant les associations médicamenteuses et en respectant les fenêtres thérapeutiques.

Cet article a fait l'objet d'un examen par les pairs.

Le Dr Birmes est affilié au Département de psychiatrie de l'Université McGill et à la Division de recherche psychosociale du Centre de recherches de l'hôpital Douglas, à Montréal (Qué.); les Drs Birmes, Coppin et Lauque sont affiliés au Service d'accueil des urgences de l'Hôpital Rangueil et au Département des urgences du Centre hospitalier universitaire de Toulouse, Toulouse, France; le Dr Schmitt est affilié au Service universitaire de psychiatrie et psychologie médicale de l'Hôpital Casselardit-La Grave et au Centre hospitalier universitaire de Toulouse, Toulouse, France.

Intérêts concurrents : Aucun déclaré.

Collaborateurs : Dr Birmes, auteur principal, a apporté une contribution majeure à l'obtention des cas cliniques (obtention des données du premier cas clinique), ainsi qu'à l'analyse de la revue de littérature correspondante et l'interprétation des données des cas cliniques en fonction des données de la littérature. Il a rédigé l'article et a donné son approbation finale aux modifications suggérées par les coauteurs. Dr Coppin, coauteur, a apporté une contribution importante à l'obtention des cas cliniques (obtention des données du deuxième cas clinique), a fait la révision critique du contenu de l'article relatif au deuxième cas clinique et a donné son approbation finale à la dernière version de l'article. Dr Schmitt, coauteur, a apporté une contribution importante à l'analyse et l'interprétation des données des cas cliniques, a fait la révision critique, avec une expertise psychiatrique, de l'article et a donné son approbation finale à la dernière version de l'article. Dr Lauque, coauteur, a apporté une contribution importante à l'analyse et l'interprétation des données des cas cliniques, a fait la révision critique, avec une expertise de médecine interne, de l'article et a donné son approbation finale à la dernière version de l'article.

**Références**

1. Stalh SM. Essential psychopharmacology. *Neuroscientific basis and practical applications*. 2e éd. Cambridge : Cambridge University Press; 2000.
2. Mason PJ, Morris VA, Balczak TJ. Serotonin syndrome. Presentation of 2 cases and review of the literature. *Medicine* 2000;79:201-9.
3. Jaunay E, Gaillac V, Guelfi JD. Syndrome sérotoninergique. Quel traitement et quand? *Presse Med* 2001;30:1695-700.
4. Gillman PK. The serotonin syndrome and its treatment. *J Psychopharmacol* 1999;13:100-9.
5. Oates JA, Sjoerdsma A. Neurologic effects of tryptophan in patients receiving monoamine oxidase inhibitor. *Neurology* 1960;10:1076-8.
6. Sarko J. Antidepressants, old and new. A review of their adverse effects and toxicity in overdose. *Emerg Med Clin North Am* 2000;18:637-54.
7. Goldberg RJ. Selective serotonin reuptake inhibitors. Infrequent medical adverse effects. *Arch Fam Med* 1998;7:78-84.
8. Mills KC. Serotonin syndrome. A clinical update. *Crit Care Clin* 1997;13:763-83.
9. Radomski JW, Dursun SM, Revely MA, Kutcher SP. An exploratory approach to the serotonin syndrome; an update of clinical phenomenology and revised diagnostic criteria. *Med Hypotheses* 2000;55:218-24.
10. Carbone JR. The neuroleptic malignant and serotonin syndromes. *Emerg Med Clin North Am* 2000;18:317-25.



11. Brosen K, Naranjo CA. Review of pharmacokinetic and pharmacodynamic interactions studies with citalopram. *Eur Neuropsychopharmacol* 2001;11:275-83.
12. Sanders-Bush E, Conn JP. Neurochemistry of serotonin neuronal systems: consequences of serotonin receptor activation. Dans : HY Meltzer, dir. *Psychopharmacology, 3rd generation of progress*. New York : Raven Press; 1987. p. 95-103.
13. Fugh-Berman A. Herb-drug interactions. *Lancet* 2000;355:134-8.
14. Sternbach H. The serotonin syndrome. *Am J Psychiatry* 1991;148:705-13.
15. Baubet T, Peronne E. Le syndrome sérotoninergique : revue critique de la littérature. *Rev Med Interne* 1997;18:380-7.
16. LoCurto MJ. The serotonin syndrome. *Emerg Med Clin North Am* 1997;15:665-75.
17. Caroff S, Mann SC. Neuroleptic malignant syndrome. *Med Clin North Am* 1993;77:185-202.
18. Pelonero AL, Levenson JL, Pandurangi AK. Neuroleptic malignant syndrome: a review. *Psychiatr Serv* 1998;49:1163-72.
19. Levenson JL. Neuroleptic malignant syndrome. *Am J Psychiatry* 1985;142:1137-45.
20. Lane R, Baldwin D. Selective serotonin reuptake inhibitor-induced serotonin syndrome: review. *J Clin Psychopharmacol* 1997;17:208-21.
21. Guze BH, Baxter LR. The serotonin syndrome: case responsive to propranolol. *J Clin Pharmacol* 1986;6:119-20.
22. Gaudins A, Stearman A, Chan B. Treatment of the serotonin syndrome with cyproheptadine. *J Emerg Med* 1998;16:615-9.
23. Chambost M, Liron L, Peillon D, Combe C. Syndrome sérotoninergique lors d'une intoxication par la fluoxétine d'une patiente prenant du moclobémide. *Can J Anaesth* 2000;47:246-50.
24. Lappin RI, Auchincloss EL. Treatment of the serotonin syndrome with cyproheptadine. *N Engl J Med* 1994;331:1021-2.
25. Gillman PK. Serotonin syndrome treated with chlorpromazine. *J Clin Psychopharmacol* 1997;17:128-9.
26. Richelson E, Souder T. Binding of antipsychotic drugs to human brain receptors. Focus on newer generation compounds. *Life Sci* 2000;68:29-39.
27. Trindade E, Menon D, Topfer LA, Coloma C. Adverse effects associated with selective serotonin reuptake inhibitors and antidepressants: a meta-analysis. *CMAJ* 1998;159:1245-52.
28. Vandemergel X, Beukinga I, Neve P. Syndrome sérotoninergique secondaire à la prise de sertraline et de métoclopramide. *Rev Med Brux* 2000;21:161-3.

---

**Pour correspondance s'adresser au D<sup>r</sup> Philippe Birmes, Service Universitaire de Psychiatrie et Psychologie Médicale, Hôpital Casselardit, C.H.U. de Toulouse, 170 avenue de Casselardit, TSA 40031, 31059 Toulouse cedex, France; télécopieur : 33 5 61 77 76 46; birmes.p@chu-toulouse.fr**
